# Supplementary material for: Morphology control of anatase TiO2 for well-defined surface chemistry
Source: Royal Society of Chemistry journal article supplement (doi:10.1039/c8cp01983e), 2018-01-01
Supplement: c8cp01983e1.pdf [file c8cp01983e1.pdf]

## Supporting Information

### Morphology control of anatase TiO<sub>2</sub> for well-defined surface chemistry

Gabriel Jeantelot,<sup>a</sup> Samy Ould-Chikh,<sup>\*a</sup> Julien Sofack-Kreutzer,<sup>a</sup> Edy Abou-Hamad,<sup>a</sup> Dalaver H. Anjum,<sup>b</sup> Sergei Lopatin,<sup>b</sup> Moussab Harb,<sup>a</sup> Luigi Cavallo<sup>a</sup> and Jean-Marie Basset<sup>\*a</sup>

<sup>a</sup> Kaust Catalysis Center (KCC), Physical Science and Engineering Division (PSE), King Abdullah University of Science and Technology (KAUST), Thuwal 23955-6900, Saudi Arabia

<sup>b</sup> Imaging and Characterization Lab, King Abdullah University of Science and Technology, Thuwal 23955-6900, Saudi Arabia.

**KEYWORDS:** Titanium dioxide, Anatase, morphology, surface hydroxyls, fluorine, NMR, DFT, FT-IR, SOMC

The TEM surface area and 001 surface proportion are given by the following equations:

$$\tan(\alpha) = \frac{c}{a}$$

$$S_{\{101\}} = 2\sqrt{1 + \tan^2(\alpha)} * \left( l_{[100]}^2 - \left( l_{[100]} - \frac{l_{[001]}}{\tan(\alpha)} \right)^2 \right)$$

$$S_{\{001\}} = 2 \left( l_{[100]} - \frac{l_{[001]}}{\tan(\alpha)} \right)^2$$

$$S_{tot} = S_{\{001\}} + S_{\{101\}}$$

$$V = \frac{\tan(\alpha)}{3} * \left( l_{[100]}^3 - \left( l_{[100]} - \frac{l_{[001]}}{\tan(\alpha)} \right)^3 \right)$$

$$\rho = \frac{4 * M_{TiO_2}}{c * a^2 * N_a}$$

$$A_{TEM} = \frac{S_{tot}}{\rho * V}$$

$$\% \{001\} = \frac{S_{\{001\}}}{S_{tot}}$$

With  $N_a$  Avogadro's constant,  $M_{TiO_2}$  the molar mass of TiO<sub>2</sub>,  $c$  and  $a$  the unit cell parameters of anatase,  $\rho$  the density of anatase,  $\alpha$  the angle between the (001) and (101) planes,  $l_{[100]}$  the average length of a particle along the [100] axis,  $l_{[001]}$  the average length of a particle along the [001] axis,  $S_{\{101\}}$  the average surface of a particle on {101} facets,  $S_{\{001\}}$  the average surface of a

particle on {001} facets,  $S_{\text{tot}}$  the average total surface of a particle,  $A_{\text{TEM}}$  the TEM surface area,  $\% \{001\}$  the proportion of {001} facets in the total particle surface.

### {101}-anatase synthesis:

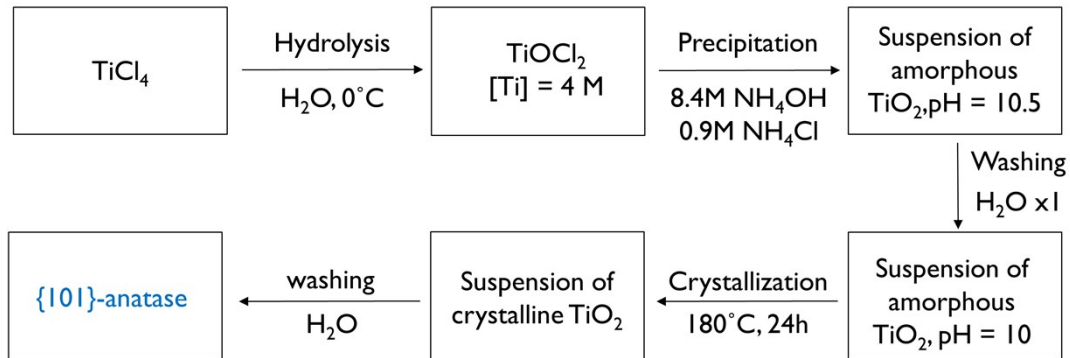

### {001}-anatase synthesis:

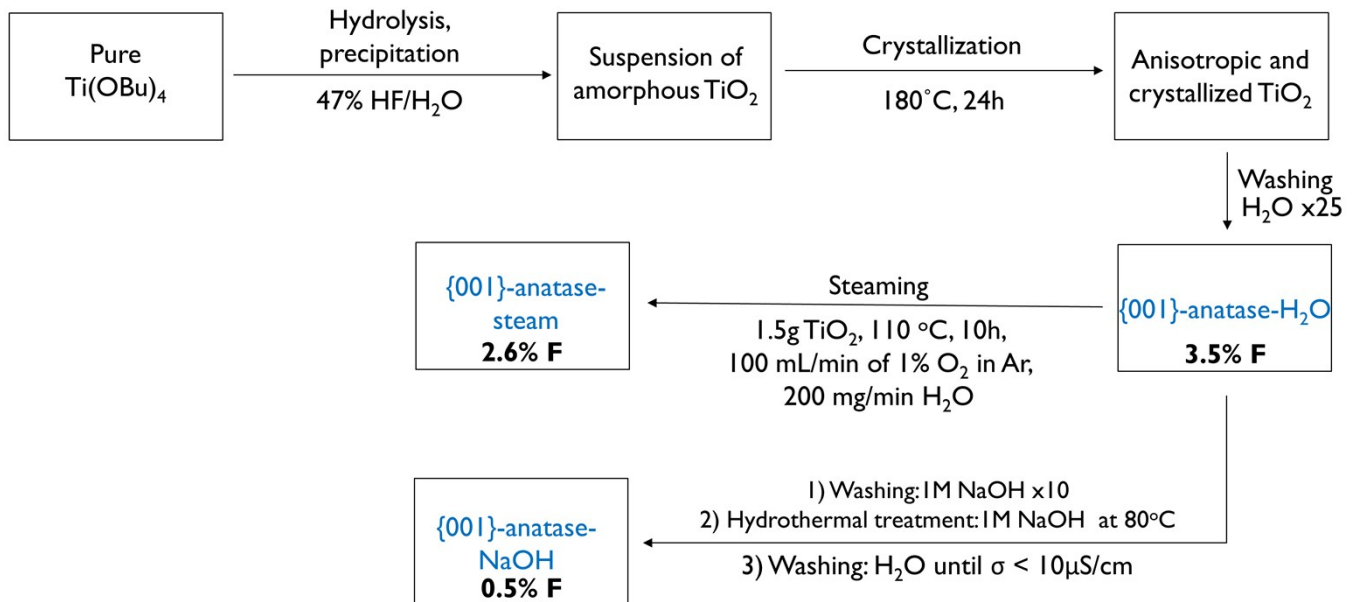

Fig. S1 Schematic representation of the syntheses of anatase samples used in this study

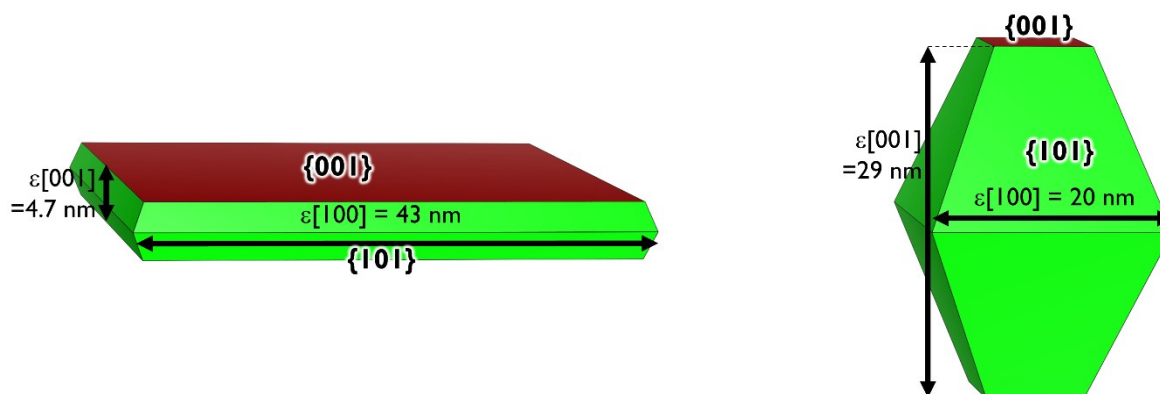

Fig. S2 Average shape of {001}-anatase (left) and {101}-anatase, based on TEM measurements.

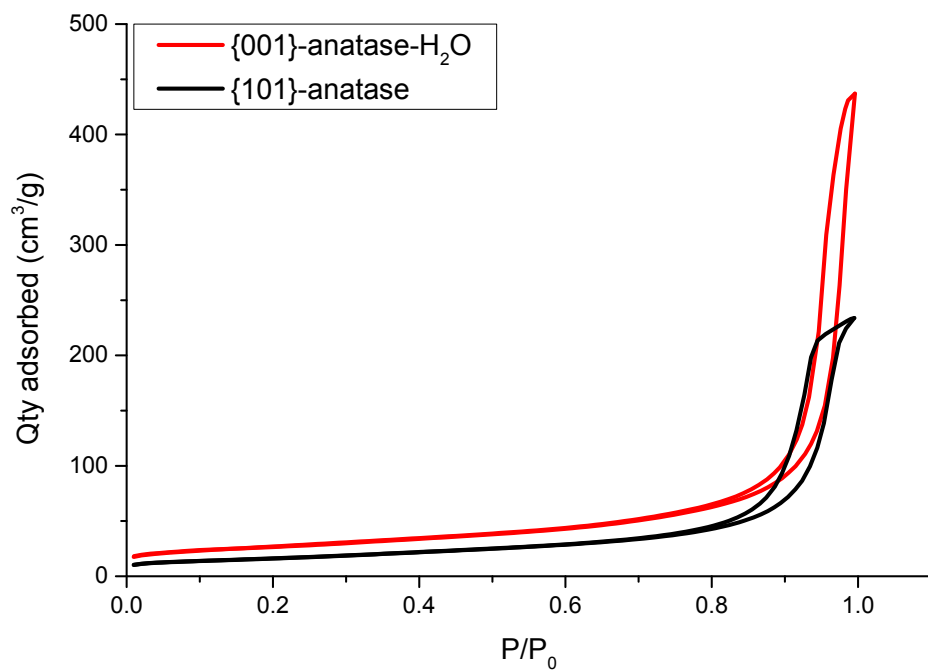

**Fig. S3** BET N2 adsorption isotherms of {001}-anatase-H<sub>2</sub>O and {101}-anatase

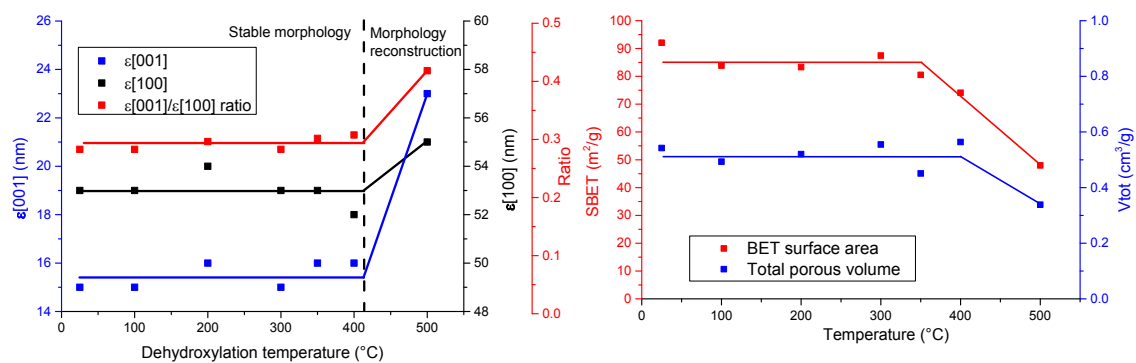

**Fig. S4** Evolution of the [001] and [100] XRD coherent domains (left) and BET surface area and porous volume (right) of {001}-anatase against dehydroxylation temperature

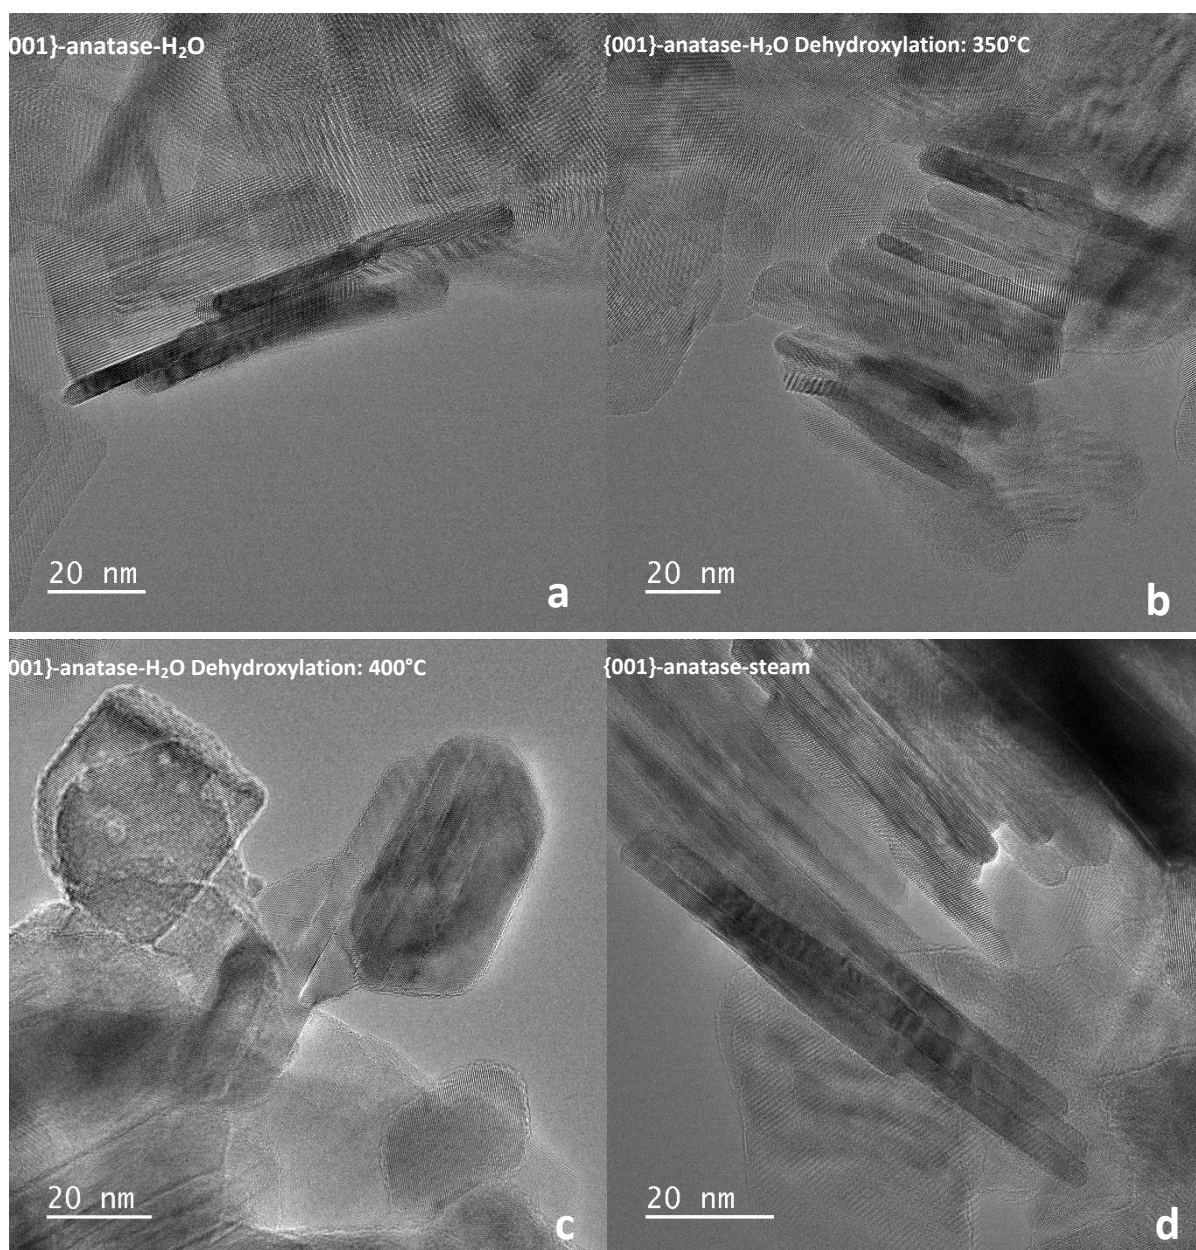

**Fig. S5** TEM micrographs of {001}-anatase. **a)** {001}-anatase-H<sub>2</sub>O **b)** {001}-anatase-H<sub>2</sub>O after dehydroxylation at 350°C. No alteration is visible. **c)** {001}-anatase-H<sub>2</sub>O after dehydroxylation at 400°C. Platelets become fused together and develop crystallographic holes **d)** {001}-anatase-steam. No alteration is visible relative to {001}-anatase-H<sub>2</sub>O



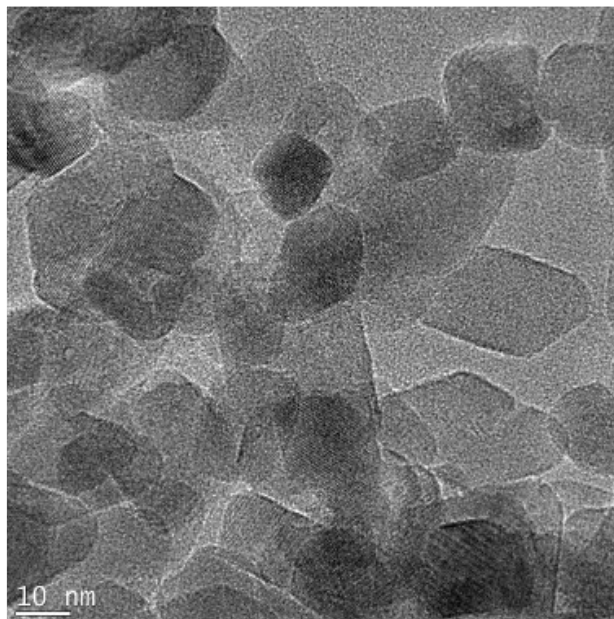

**Fig. S6** TEM micrograph of {101}-anatase.

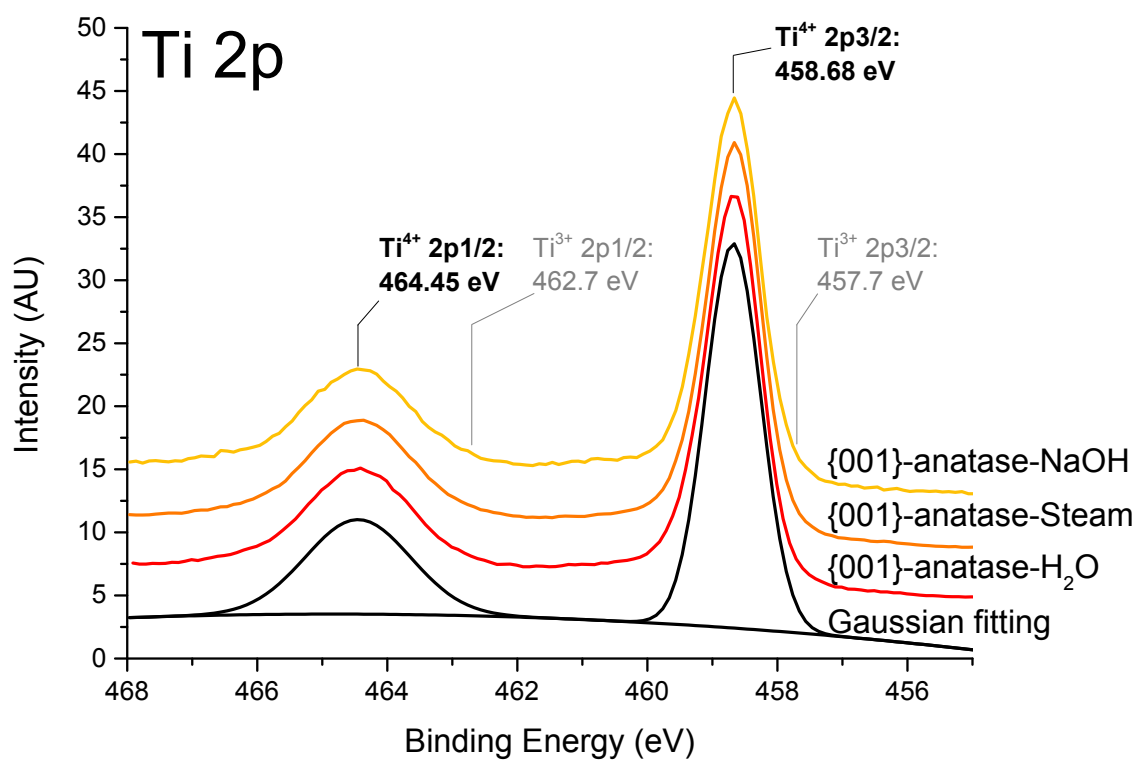

**Fig. S7** XPS spectra showing the Ti 2p binding energies of {001}-anatase samples and their gaussian fitting : only  $\text{Ti}^{4+}$  are seen, with  $\text{Ti}^{4+}$  2p<sub>1/2</sub> and 2p<sub>3/2</sub> binding energies of 464.45 eV and 458.68 eV respectively. No  $\text{Ti}^{3+}$  2p<sub>1/2</sub> or 2p<sub>3/2</sub> peaks are seen at 462.7 or 457.7 eV.<sup>1-3</sup>

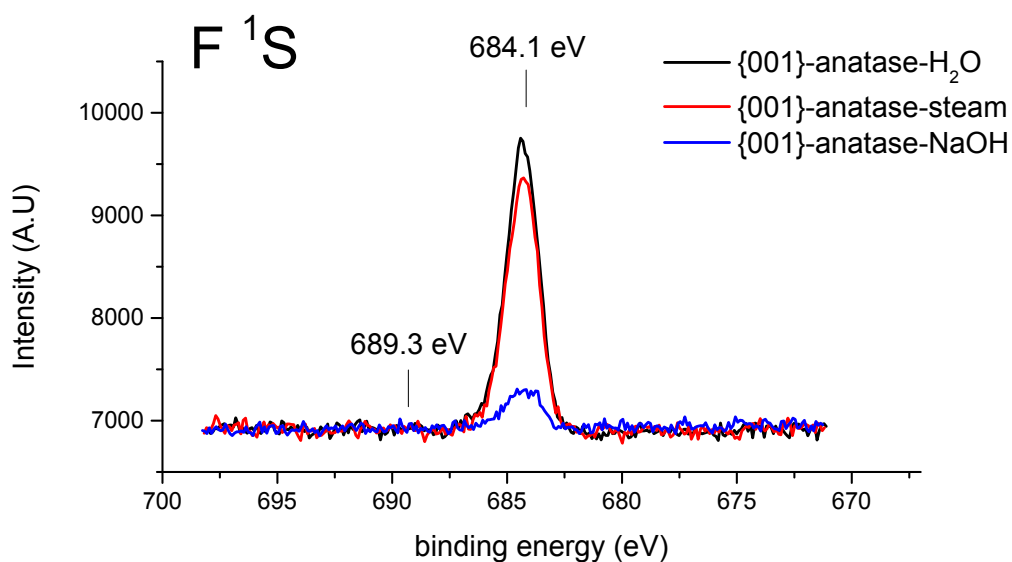

**Fig. S8** XPS spectra showing the F 1s binding energy of {001}-anatase samples

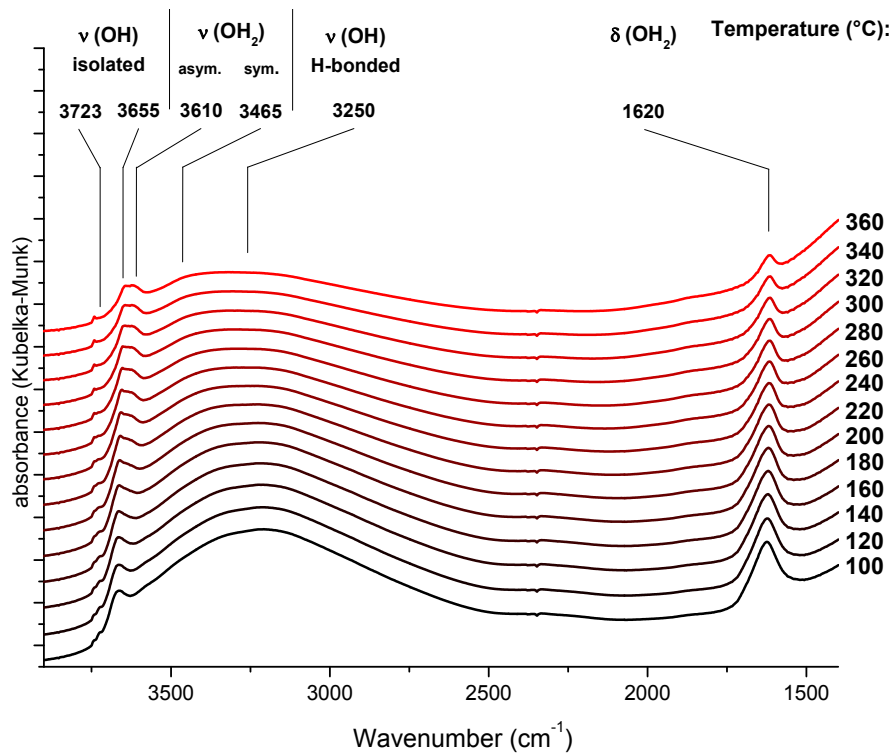

**Fig. S9** In-situ DRIFTS of {001}-anatase-H<sub>2</sub>O under flow of 20% oxygen in argon at varying temperature

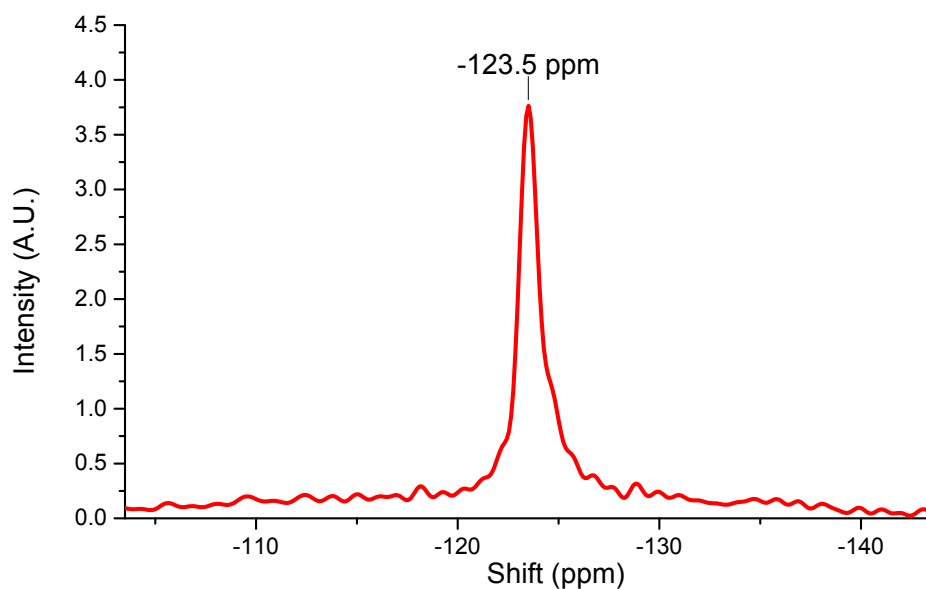

**Fig. S10**  $^{19}\text{F}$  MAS SSNMR of sample {001}-anatase-steam after dehydroxylation at 200°C

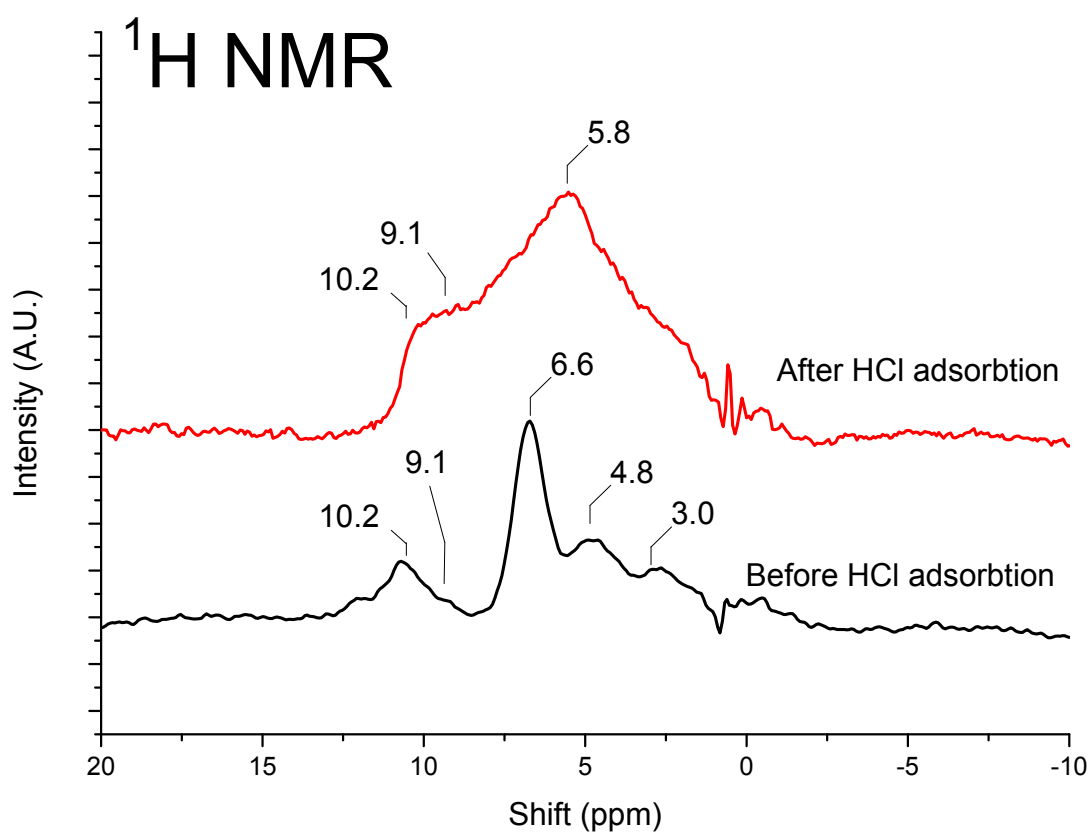

**Fig. S11**  $^1\text{H}$  MAS SSNMR of sample {001}-anatase-steam dehydroxylated at 200°C before and after adsorption of gaseous HCl (1 bar HCl for 5h,  $10^{-5}$  mbar dynamic vacuum for 12h).

- 1 X. Liu, S. Gao, H. Xu, Z. Lou, W. Wang, B. Huang and Y. Dai, *Nanoscale*, 2013, **5**, 1870–1875.
- 2 T.-S. Yang, M.-C. Yang, C.-B. Shiu, W.-K. Chang and M.-S. Wong, *Appl. Surf. Sci.*, 2006, **252**, 3729–3736.
- 3 L. Si, Z. Huang, K. Lv, D. Tang and C. Yang, *J. Alloys Compd.*, 2014, **601**, 88–93.
